# Supplementary material for: Implementation of a novel stratified PAthway of CarE for common musculoskeletal (MSK) conditions in primary care: protocol for a multicentre pragmatic randomised controlled trial (the PACE MSK trial)
Source: PubMed Central journal article supplement — BMJ Open. 2021 Dec 25;11(12):e057705. doi: 10.1136/bmjopen-2021-057705 (PMC8718479; doi:10.1136/bmjopen-2021-057705), 2021-12-25
Supplement: bmjopen-2021-057705.reviewer_comments.pdf [file bmjopen-2021-057705.reviewer_comments.pdf]

## PEER REVIEW HISTORY

BMJ Open publishes all reviews undertaken for accepted manuscripts. Reviewers are asked to complete a checklist review form (<http://bmjopen.bmj.com/site/about/resources/checklist.pdf>) and are provided with free text boxes to elaborate on their assessment. These free text comments are reproduced below.

## ARTICLE DETAILS

|                            |                                                                                                                                                                                                                                                                                                                                 |
|----------------------------|---------------------------------------------------------------------------------------------------------------------------------------------------------------------------------------------------------------------------------------------------------------------------------------------------------------------------------|
| <b>TITLE (PROVISIONAL)</b> | Implementation of a novel stratified Pathway of CarE for common musculoskeletal (MSK) conditions in primary care: protocol for a multi-centre pragmatic randomised controlled trial (the PACE MSK trial).                                                                                                                       |
| <b>AUTHORS</b>             | Rebbeck, Trudy; Evans, Kerrie; Ferreira, Paulo; Beales, Darren; Sterling, Michele; Bennell, Kim; Cameron, Ian; Nicholas, Michael; Ritchie, Carrie; Jull, Gwen; Treleaven, Julia; Trevena, Lyndal; Refshauge, Kathryn; Connelly, Luke; Foster, Nadine; Black, Deborah; Hodges, Paul; Ferreira, Manuela; Shaw, Tim; Simic, Milena |

This article was not externally reviewed at BMJ Open. Protocols that have been independently assessed prior to submission to BMJ Open are usually fast-tracked to publication on the grounds that further substantial changes will not be possible. This independent assessment will usually be external, independent review for both a substantial grant award from a non-commercial or government funder and ethics approval.
